# Supplementary material for: Neurodifferentiation and Neuroprotection Potential of Mesenchymal Stromal Cell-Derived Secretome Produced in Different Dynamic Systems
Source: MDPI journal article supplement (doi:10.3390/biomedicines11051240), 2023-04-22

## ***Supplementary Material for Biomedicines id:2223140***

### ***Article: Neurodifferentiation and neuroprotection potential of mesenchymal stromal cell-derived secretome produced in different dynamic systems***

**Cláudia Raquel Marques<sup>1,2</sup>, Miguel de Almeida Fuzeta<sup>3,4</sup>, Raquel Medina dos Santos Cunha<sup>3,4</sup>, Joana Pereira de Sousa<sup>1,2</sup>, Deolinda Silva<sup>1,2</sup>, Jonas Campos<sup>1,2</sup>, Andreia Teixeira-Castro<sup>1,2</sup>, Rui Amandi Sousa<sup>5</sup>, Ana Fernandes-Platzgummer<sup>3,4</sup>, Cláudia Lobato da Silva<sup>3,4†</sup>, António José Salgado<sup>1,2†\*</sup>**

#### **1 Supplementary Table**

**Supplementary Table S1.** Statistical report. Effect sizes calculated using Lenhard, W. (2016), Uanhero, J. O. (2017), and [https://www.psychometrica.de/effect\\_size.html](https://www.psychometrica.de/effect_size.html). Effect size calculator available online at <https://effect-size-calculator.herokuapp.com/>.

| <b>Figure</b> | <b>Statistical report</b>                                                                          | <b>Sample size</b> |
|---------------|----------------------------------------------------------------------------------------------------|--------------------|
| <b>4 B</b>    | $F(2,155.566) = 29.911, p < 0.001, \omega^2 p = 0.267$                                             | 160 (per group)    |
| <b>4 C</b>    | $F(2,183.822) = 105.599, p < 0.001, \omega^2 p = 0.528$                                            | 160 (per group)    |
| <b>5 A</b>    | $F(3,73.496) = 24.690, p < 0.001, \omega^2 p = 0.478$                                              | 36 (per group)     |
| <b>5 B</b>    | $\chi^2 (3) = 38.223, p < 0.001, V = 0.297$                                                        | 36 (per group)     |
| <b>5 C</b>    | CEP $\chi^2 (3) = 43.923, p < 0.001, V = 0.319$<br>ADE $\chi^2 (3) = 17.542, p < 0.001, V = 0.201$ | 36 (per group)     |

#### **2 Supplementary Figures**

**Supplementary Figure S1.** Average yield of lactate from glucose ( $Y'_{\text{Lac/Glc}}$ ). The  $Y'_{\text{Lac/Glc}}$  was determined throughout time for cultures in the (A) SP and in the (B) VWBR. Results are presented as mean  $\pm$  SD. SP, Spinner flask system; VWBR, Vertical-Wheel™ bioreactor; SD, standard deviation.

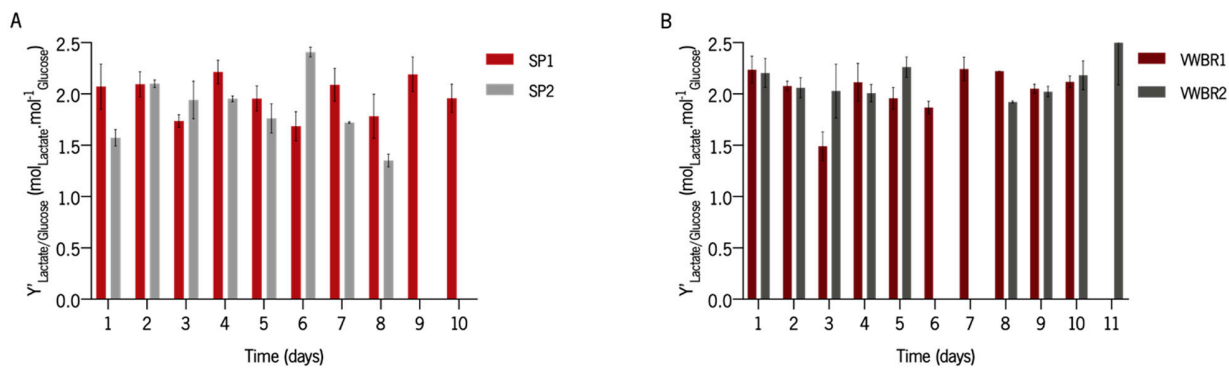

**Supplementary Figure S2.** Gating strategy for the MSC markers according to Dominici et al. 2006 [1]. Dot plots are representative from the VWBR cells. The same strategy was employed in all expansions systems. .

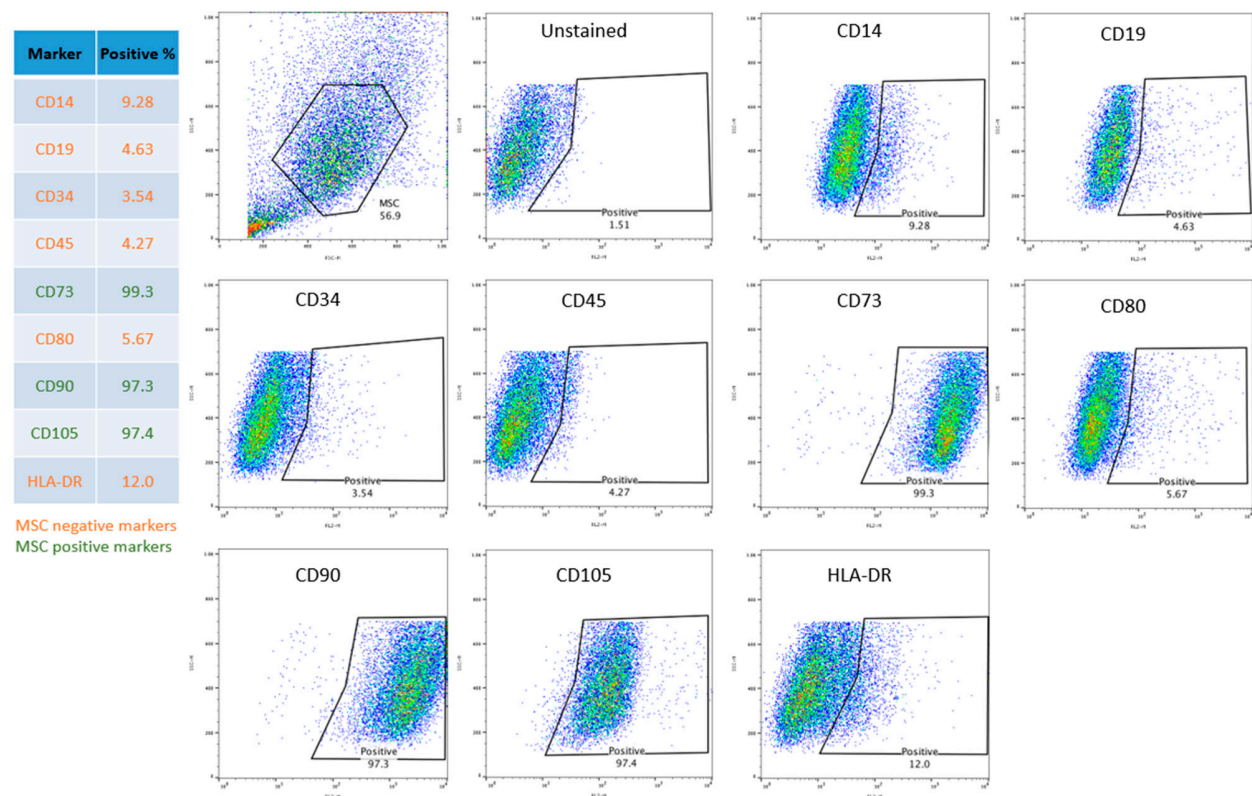

Supplement: s1 [file s1]
